# Supplementary material for: Adaptation of Brucella melitensis Antimicrobial Susceptibility Testing to the ISO 20776 Standard and Validation of the Method
Source: MDPI journal article supplement (doi:10.3390/microorganisms10071470), 2022-07-20
Supplement: s1 [file s1]

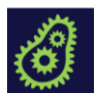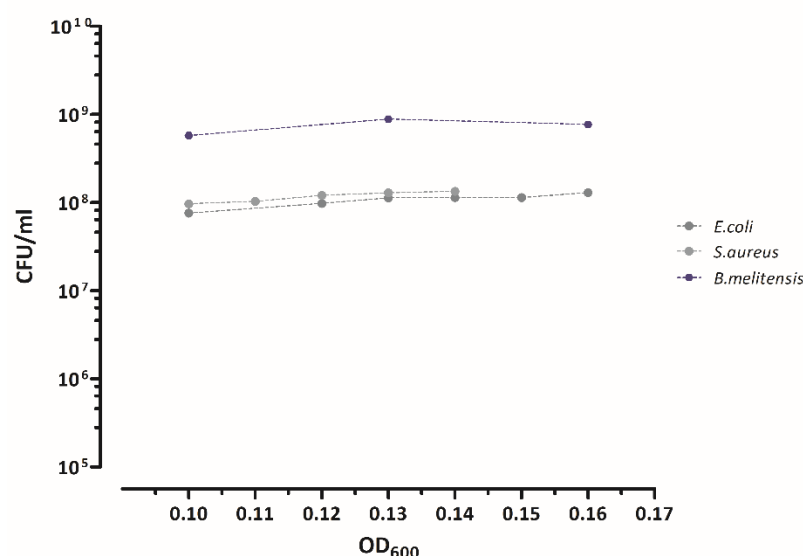

**Figure S1.** Determination of colony forming units (CFU) in a 0.4 to 0.6 McFarland suspension. Three bacterial strains (*E. coli* 1103, *B. melitensis* reference strain ATCC 23456 and *S. aureus*) were diluted to McFarland standards between 0.4 to 0.6 and afterwards, the corresponding OD<sub>600</sub> were determined. 10-fold serial dilutions in 0.9% NaCl were made and 100 µl of each dilution were plated on Colombia agar plates. Subsequently, colonies were counted and the number of CFU/ml in the original undiluted solution was calculated.

**Table S1.** Comparison of five different culture media recommended for fastidious organism (BB, CAMHB, CAMHB-F, CAMHB-X and H- medium). BMD was performed in triplicates using CAMHB, CAMHB-F, CAMHB-X and H-medium and repeated six times for BB. MIC values were determined after incubation in a 5% CO<sub>2</sub> atmosphere for 48 h. The numbers in the table represent the range of the tested MIC values (a) *B. melitensis* reference strain ATCC 23456. (b) *B. melitensis* clinical isolate Bm150048. CIP, ciprofloxacin; LEV, levofloxacin; DOX, doxycycline; GEN, gentamicin; STR, streptomycin; SXT, trimethoprim-sulfamethoxazole; RIF, rifampicin

(a)

| Antimicrobial substance | BB (mg/L)  | CAMHB (mg/L) | CAMHB-X (mg/L) | CAMHB-F (mg/L) | H-Medium (mg/L) |
|-------------------------|------------|--------------|----------------|----------------|-----------------|
| GEN                     | 0.5-1      | 0.5          | 0.5            | 0.5            | 0.5             |
| STR                     | 2-4        | 2            | 2              | 2              | 1-2             |
| RIF                     | 1-2        | 1            | 0.5            | 1-4            | 2               |
| DOX                     | 0.06-0.125 | 0.06         | 0.06           | 0.125-0.5      | 0.25-0.5        |
| SXT                     | 0.5-1      | 0.02         | 0.125          | 0.25           | 2               |
| LEV                     | 0.5        | 0.5          | 0.5            | 0.5            | 0.5             |
| CIP                     | 0.5        | 0.5          | 0.5            | 0.5            | 0.5             |

(b)

| Antimicrobial substance | BB (mg/L)  | CAMHB (mg/L) | CAMHB-X (mg/L) | CAMHB-F (mg/L) | H-Medium (mg/L) |
|-------------------------|------------|--------------|----------------|----------------|-----------------|
| GEN                     | 0.5-2      | 0.25         | 0.25-0.5       | 0.5            | 0.5             |
| STR                     | 2          | 1            | 0.5-1          | 2              | 1               |
| RIF                     | 4          | 4            | 2              | 4              | 4               |
| DOX                     | 0.125-0.25 | 0.125        | 0.25           | 0.25           | 0.25-0.5        |
| SXT                     | 1-4        | 0.06         | 0.125-0.25     | 0.25-0.5       | 4               |
| LEV                     | 0.5        | 0.5          | 0.5            | 0.5            | 0.5             |
| CIP                     | 0.5        | 0.5          | 0.5            | 0.5            | 0.5             |

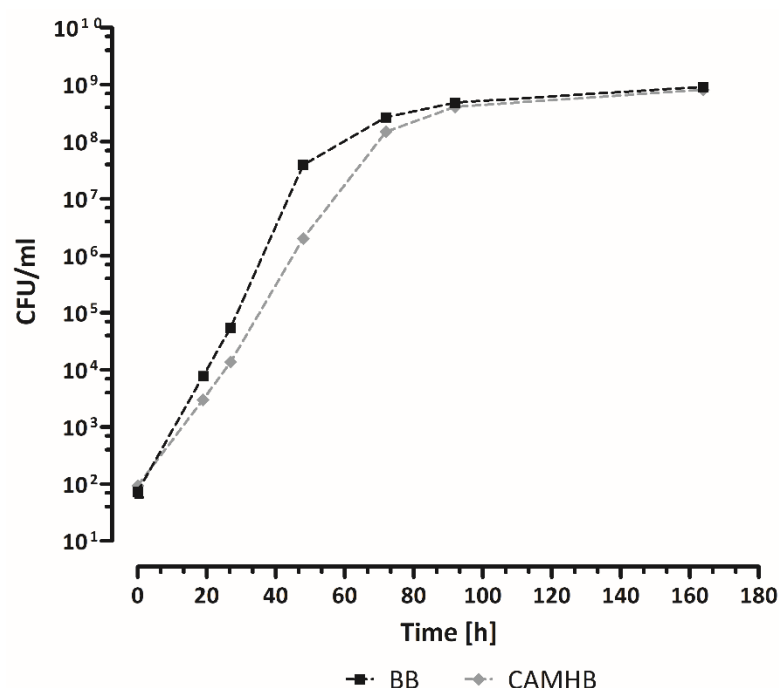

**Figure S2.** Growth curve of Bm150048 in two different culture media (BB, CAMHB). Each dot represents the mean value of 3 replicates. BB, *Brucella* broth; CAMHB, cation adjusted Mueller-Hinton II broth;

**Table S2.** Comparison of BMD and AD using two different culture media (BB, CAMHB). *B. melitensis* reference strain ATCC 23456 and *B. melitensis* clinical isolate Bm150048 were used in triplicates to compare MIC values obtained with BMD and AD when using (a) BB or (b) CAMHB. MIC values were obtained after incubation in a 5% CO<sub>2</sub> atmosphere for 48 h. The numbers in the table represent the MIC or range of MICs of the repeated tests. DOX, doxycycline; GEN, gentamicin; STR, streptomycin; SXT, trimethoprim-sulfamethoxazole; RIF, rifampicin

(a)

| Antimicrobial substance | ATCC 23456 |          | Bm150048 |          |
|-------------------------|------------|----------|----------|----------|
|                         | BMD        | AD       | BMD      | AD       |
| GEN (mg/L)              | 0.5-1      | 1        | 0.5-1    | 0.5-1    |
| STR (mg/L)              | 2-4        | 4        | 2        | 2-8      |
| RIF (mg/L)              | 2-4        | 2        | 4        | 4        |
| DOX (mg/L)              | 0.06-0.125 | 0.25-0.5 | 0.25     | 0.25-0.5 |
| SXT (mg/L)              | 0.5-1      | 1        | 0.5-1    | 0.5-1    |

(b)

| Antimicrobial substance | ATCC 23456 |           | Bm150048 |            |
|-------------------------|------------|-----------|----------|------------|
|                         | BMD        | AD        | BMD      | AD         |
| GEN (mg/L)              | 0.5        | 0.25-0.5  | 0.25     | 0.25-0.5   |
| STR (mg/L)              | 2          | 2-4       | 1        | 2-4        |
| RIF (mg/L)              | 1          | 1         | 4        | 4          |
| DOX (mg/L)              | 0.06       | 0.25      | 0.25     | 0.25       |
| SXT (mg/L)              | 0.02       | 0.03-0.06 | 0.06     | 0.06-0.125 |

**Table S3.** Impact of incubation time on MIC values. BMD was performed in triplicates and MIC values were determined after incubation in 5% CO<sub>2</sub> for 18–64 h. The numbers in the table represent the MIC or range of MICs of the repeated tests. **(a)** CAMHB **(b)** BB. CIP, ciprofloxacin; LEV, levofloxacin; DOX, doxycycline; GEN, gentamicin; STR, streptomycin; SXT, trimethoprim-sulfamethoxazole; RIF, rifampicin

**(a)**

| Antimicrobial substance | 18 h   | 24 h   | 42 h  | 48 h  | 64 h       |
|-------------------------|--------|--------|-------|-------|------------|
| GEN (mg/L)              | <0.016 | <0.016 | 0.25  | 0.25  | 0.25       |
| STR (mg/L)              | <0.125 | <0.125 | 0.5   | 1     | 1          |
| RIF (mg/L)              | <0.25  | <0.25  | 2–4   | 4     | 4          |
| DOX (mg/L)              | <0.016 | <0.016 | 0.125 | 0.125 | 0.125–0.25 |
| SXT (mg/L)              | <0.008 | <0.008 | 0.031 | 0.031 | 0.062      |
| LEV (mg/L)              | <0.004 | <0.004 | 0.5   | 0.5   | 0.5        |
| CIP (mg/L)              | <0.004 | <0.004 | 0.5   | 0.5   | 0.5        |

**(b)**

| Antimicrobial substance | 18 h   | 24 h     | 42 h  | 48 h  | 64 h |
|-------------------------|--------|----------|-------|-------|------|
| GEN (mg/L)              | <0.016 | 0.25     | 0.5   | 0.5   | 0.5  |
| STR (mg/L)              | <0.125 | 0.5–1    | 2     | 2     | 2    |
| RIF (mg/L)              | <0.25  | 2        | 2–4   | 4     | 4    |
| DOX (mg/L)              | <0.016 | 0.0625   | 0.125 | 0.125 | 0.25 |
| SXT (mg/L)              | <0.008 | 1        | 1–2   | 1–2   | 1–2  |
| LEV (mg/L)              | <0.004 | 0.25–0.5 | 0.5   | 0.5   | 0.5  |
| CIP (mg/L)              | <0.004 | 0.5      | 0.5   | 0.5   | 0.5  |

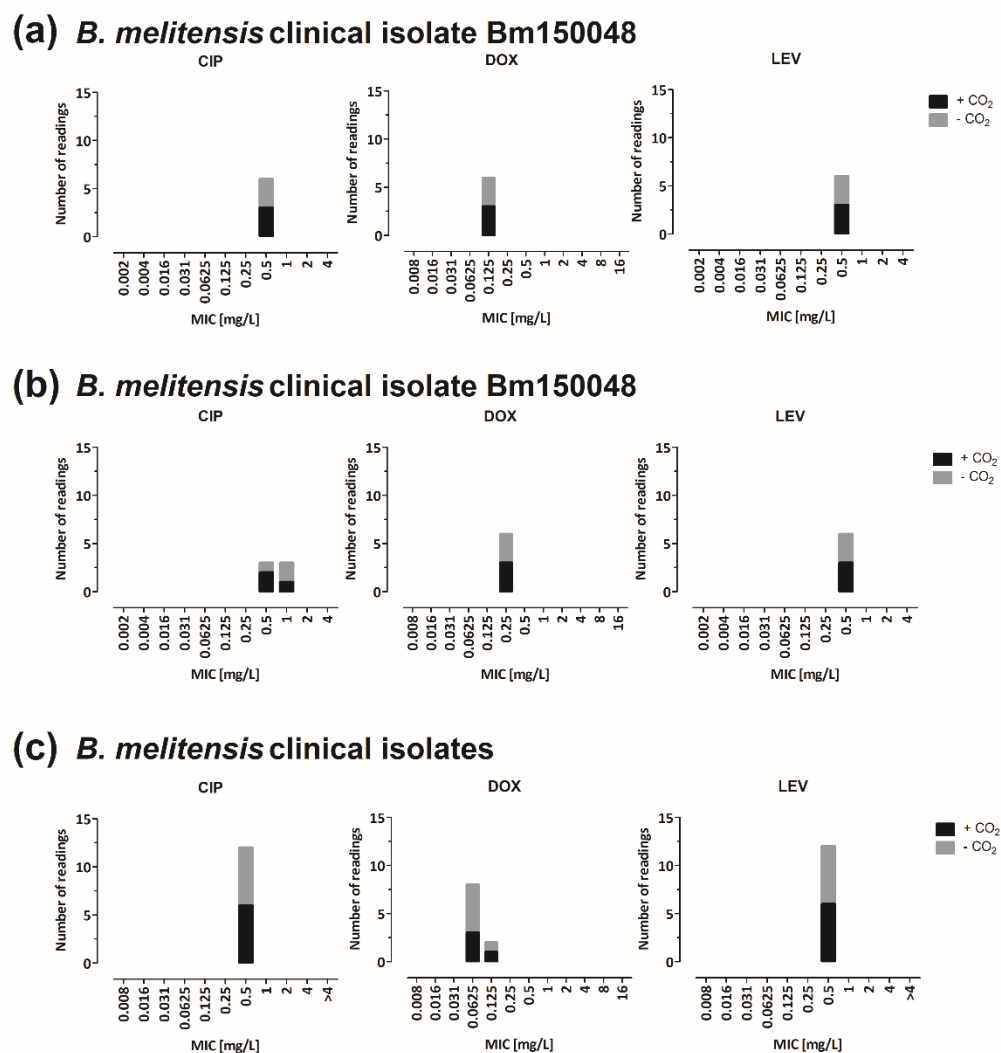

**Figure S3.** Impact of the cultivation atmosphere on MIC values. MIC values were determined in triplicates (a, b) or once (c) after incubation at  $36 \pm 1^\circ\text{C}$  with or without 5% CO<sub>2</sub> for 48 h. CAMHB was used as culture medium. (a) Reference strain ATCC 23456. (b) Clinical isolate Bm150048. (c) Six clinical isolates. CIP, ciprofloxacin; LEV, levofloxacin; DOX, doxycycline;
